# Supplementary material
Source: ML conference proceedings conference paper supplement (https://proceedings.neurips.cc/paper_files/paper/2020/hash/d0921d442ee91b896ad95059d13df618-Abstract.html)
Supplement: Supplementary file [file d0921d442ee91b896ad95059d13df618-Supplemental.pdf]

---

# Fair Multiple Decision Making Through Soft Interventions (Supplementary File)

---

**Yaowei Hu**

University of Arkansas  
yaoweihu@uark.edu

**Yongkai Wu**

Clemson University  
yongkaw@clemson.edu

**Lu Zhang**

University of Arkansas  
lz006@uark.edu

**Xintao Wu**

University of Arkansas  
xintaowu@uark.edu

## 1 Proof of Theorem 1

**Theorem 1.** For any classification-calibrated loss function  $\phi$  satisfying  $\phi(0) = 1$  and  $\inf_{\alpha \in \mathbb{R}} \phi(\alpha) = 0$ , any measurable function  $h_k$  for predicting  $Y_k$ , we have

$$\psi(R(h_k) - R^*) \leq R_\phi(h_k) - R_\phi^*,$$

where  $\psi(\delta)$  is a non-decreasing function mapping from  $[0, 1]$  to  $[0, \infty)$ .

**Lemma 1.** For  $\psi$ ,  $H_\phi$  and  $H_\phi^-$ , they have following properties.

1. For  $\lambda \in [0, 1]$  and  $\gamma \in \mathbb{R}$ ,  $\psi(\lambda\gamma) \leq \lambda\psi(\gamma)$ .
2.  $H_\phi^-(\eta) \geq H_\phi(\eta)$  for  $\eta \in [0, 1]$ .
3.  $\eta \leq H_\phi(\eta)$  for  $\eta \in [0, 1/2]$ .
4.  $\eta \leq 1 \leq H_\phi^-(\eta)$  for  $\eta \in [0, 1]$ .

*Proof.* Parts 1,2,3 are proved in [1]. For Part 4, note that  $H_\phi$  is concave and symmetric about  $1/2$ , meaning that it gets its minimum at  $\eta = 0, 1$  and maximum at  $\eta = 1/2$  [1]. We have  $H_\phi(0) = H_\phi(1) = \inf_{\alpha \in \mathbb{R}} \phi(\alpha) = 0$ . Meanwhile, we have  $H_\phi(1/2) = 1/2 \cdot \inf_{\alpha \in \mathbb{R}} (\phi(\alpha) + \phi(-\alpha))$ . Due to the convexity and symmetry between  $\phi(\alpha)$  and  $\phi(-\alpha)$ , we can see that  $H_\phi(1/2) = \phi(0) = 1$ . Then, since  $H_\phi$  is concave, we have  $\eta H_\phi(1/2) + \bar{\eta} H_\phi(0) \leq H_\phi(\eta/2 + \bar{\eta} \cdot 0)$ , which leads to  $\eta \leq H_\phi(\eta/2) \leq H_\phi(\eta)$  for  $\eta \in [0, 1/2]$ .

For Part 5, note that  $H_\phi^-$  is concave on  $[0, 1/2]$  and on  $[1/2, 1]$  and also symmetric about  $1/2$  [1]. Since  $H_\phi^-(1/2) = H_\phi(1/2) = 1$  and  $H_\phi^-(0) = H_\phi^-(1) = \inf_{\alpha \leq 0} \phi(\alpha) = \phi(0) = 1$ , we have  $H_\phi^-(\eta) \geq 1 \geq \eta$ .  $\square$

Next, we first prove Theorem 1 based on the toy example in the main paper, and then explain how this proof can be extended to general situations.

### 1.1 Proof of Theorem 1 Based on Toy Example

*Proof of Theorem 1.* The causal graph of the toy example is shown in Fig. 1. In the example, we have two classifiers  $h_1, h_2$ . Note that  $R_\phi(h_1)$  is the same as that of a single decision model, so we

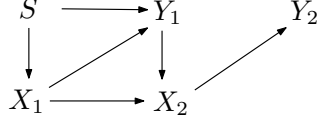

Figure 1: The toy model.

focus on  $R_\phi(h_2)$ . Denoting  $\mathbf{Z} = \{S, X_1, X_2\}$ , we define

$$c_1(\mathbf{z}) = \frac{P(y_1^+ | s, x_1, x_2)}{P(y_1^+ | s, x_1)} + \frac{P(y_1^- | s, x_1, x_2)}{P(y_1^- | s, x_1)},$$

and define

$$\eta_1(\mathbf{z}) = \frac{P(y_1^- | s, x_1, x_2)}{c_1(\mathbf{z})}, \quad \eta_2(\mathbf{z}) = P(y_2^+ | x_2),$$

and

$$\bar{\eta}_1(\mathbf{z}) = 1 - \eta_1(\mathbf{z}), \quad \bar{\eta}_2(\mathbf{z}) = 1 - \eta_2(\mathbf{z}),$$

For simplifying representation, in the remaining of this file we omit  $(\mathbf{z})$  in all expressions.

Note that

$$\begin{aligned} R_\phi(h_2) &= \mathbb{E}_{\mathbf{z}} [c_1 (\eta_1 \eta_2 \phi(h_1(x_1)) \phi(h_2(x_2)) + \bar{\eta}_1 \eta_2 \phi(-h_1(x_1)) \phi(h_2(x_2))) \\ &\quad + \eta_1 \bar{\eta}_2 \phi(h_1(x_1)) \phi(-h_2(x_2)) + \bar{\eta}_1 \bar{\eta}_2 \phi(-h_1(x_1)) \phi(-h_2(x_2)))] \\ &= \mathbb{E}_{\mathbf{z}} [c_1 (\eta_1 \phi(h_1(x_1)) + \bar{\eta}_1 \phi(-h_1(x_1) > 0)) (\eta_2 \phi(h_2(x_2)) + \bar{\eta}_2 \phi(-h_2(x_2)))] \\ &= \mathbb{E}_{\mathbf{z}} [c_1 C_\phi^{\eta_1}(h_1(x_1)) C_\phi^{\eta_2}(h_2(x_2))], \end{aligned}$$

we can express  $R_\phi(h_2)$  using the generic  $\phi$ -conditional risk  $C_\phi^\eta(\alpha)$ . According to the definition of  $R_\phi^*$ , we correspondingly have

$$R_\phi^* = \mathbb{E}_{\mathbf{z}} [c_1 H_\phi(\eta_1) H_\phi(\eta_2)].$$

Similarly we can also express  $R(h_2)$  and  $R^*$  as

$$\begin{aligned} R(h_2) &= \mathbb{E}_{\mathbf{z}} [c_1 C^{\eta_1}(h_1(x_1)) C^{\eta_2}(h_2(x_2))], \\ R^* &= \mathbb{E}_{\mathbf{z}} [c_1 H(\eta_1) H(\eta_2)], \end{aligned}$$

where  $C^\eta(\alpha)$  and  $H(\eta)$  are defined by replacing  $\phi$  with  $\mathbb{1}$  in  $C_\phi^\eta(\alpha)$  and  $H_\phi(\eta)$ . Note that  $H(\eta)$  is always obtained when the sign of  $\alpha$  is the same as the sign of  $\eta - 1/2$ .

Denote by  $\alpha^*$  the signs of solutions  $\{\text{sign}(\eta_1 - 1/2), \text{sign}(\eta_2 - 1/2)\}$ . Then, we have

$$\begin{aligned} R(h_2) - R^* &= \mathbb{E}_{\mathbf{z}} [c_1 (C^{\eta_1}(h_1(x_1)) C^{\eta_2}(h_2(x_2)) - H(\eta_1) H(\eta_2))] \\ &= \mathbb{E}_{\mathbf{z}} [c_1 \mathbb{1}(\text{sign}(h) \neq \alpha^*) (C^{\eta_1}(h_1(x_1)) C^{\eta_2}(h_2(x_2)) - H(\eta_1) H(\eta_2))]. \end{aligned}$$

Since  $\psi$  is convex [1], it follows that

$$\psi(R(h_2) - R^*) \leq \mathbb{E}_{\mathbf{z}} [c_1 \mathbb{1}(\text{sign}(h) \neq \alpha^*) \psi(C^{\eta_1}(h_1(x_1)) C^{\eta_2}(h_2(x_2)) - H(\eta_1) H(\eta_2))].$$

Without loss of generality, assume  $\eta_1 \leq \bar{\eta}_1$  and  $\eta_2 \leq \bar{\eta}_2$ . Thus, according to the definition,  $H(\eta_1) = \eta_1$  and  $H(\eta_2) = \eta_2$ . Then, we want to show that for any  $h_1, h_2$  whose signs are not equivalent to  $\alpha^*$ , we have

$$\psi(C^{\eta_1}(h_1(x_1)) C^{\eta_2}(h_2(x_2)) - H(\eta_1) H(\eta_2)) \leq H_\phi^-(\eta_1) H_\phi^-(\eta_2) - H_\phi(\eta_1) H_\phi(\eta_2). \quad (1)$$

To this end, we consider two cases: (1) only one classifier from  $h_1, h_2$  makes the prediction that is opposite to  $\alpha^*$ ; and (2) both  $h_1, h_2$  make predictions that are opposite to  $\alpha^*$ .

For Case (1), assume that  $h_1$  makes the opposite prediction. Thus,  $C^{\eta_1}(h_1(x_1)) = \bar{\eta}_1$ , and  $C^{\eta_2}(h_2(x_2)) = \eta_2$ . Then, we have

$$\psi(C^{\eta_1}(h_1(x_1))C^{\eta_2}(h_2(x_2)) - H(\eta_1)H(\eta_2)) = \psi((\bar{\eta}_1 - \eta_1)\eta_2).$$

Based on Lemma 1, Part 1, it follows that

$$\psi((\bar{\eta}_1 - \eta_1)\eta_2) \leq \eta_2\psi(\bar{\eta}_1 - \eta_1) = \eta_2\left(H_\phi^-(\eta_1) - H_\phi(\eta_1)\right).$$

Based on Lemma 1, Part 3, we have  $\eta_2 \leq H_\phi(\eta_2)$ . So it follows that

$$\psi((\bar{\eta}_1 - \eta_1)\eta_2) \leq \left(H_\phi^-(\eta_1) - H_\phi(\eta_1)\right)H_\phi(\eta_2).$$

Based on Lemma 1, Part 2, we prove Eq. (1).

For Case (2), we have  $C^{\eta_1}(h_1(x_1)) = \bar{\eta}_1$ , and  $C^{\eta_2}(h_2(x_2)) = \bar{\eta}_2$ . Thus,

$$\psi(C^{\eta_1}(h_1(x_1))C^{\eta_2}(h_2(x_2)) - H(\eta_1)H(\eta_2)) = \psi(\bar{\eta}_1\bar{\eta}_2 - \eta_1\eta_2).$$

Without loss of generality, assume  $\eta_1 \leq \eta_2$ , i.e.,  $\bar{\eta}_2 \leq \bar{\eta}_1$ . We have that

$$\begin{aligned} \bar{\eta}_1\bar{\eta}_2 - \eta_1\eta_2 &= \bar{\eta}_1\bar{\eta}_2 - \eta_1\eta_2 - \eta_1\bar{\eta}_2 + \eta_1\bar{\eta}_2 \\ &= \bar{\eta}_2(\bar{\eta}_1 - \eta_1) + \eta_1(\bar{\eta}_2 - \eta_2) \\ &\leq \bar{\eta}_1(\bar{\eta}_1 - \eta_1) + \eta_1(\bar{\eta}_2 - \eta_2). \end{aligned} \tag{2}$$

Since  $\psi$  is convex, we have

$$\begin{aligned} \psi(\bar{\eta}_1\bar{\eta}_2 - \eta_1\eta_2) &\leq \psi(\bar{\eta}_1(\bar{\eta}_1 - \eta_1) + \eta_1(\bar{\eta}_2 - \eta_2)) \\ &\leq \bar{\eta}_1\psi(\bar{\eta}_1 - \eta_1) + \eta_1\psi(\bar{\eta}_2 - \eta_2). \end{aligned}$$

According to the definition of  $\psi$ , we have  $\psi(\bar{\eta} - \eta) = H_\phi^-(\eta) - H_\phi(\eta)$ . According to Lemma 1, Parts 4&3, we have  $\bar{\eta}_1 \leq 1 \leq H_\phi^-(\eta_2)$ ,  $\eta_1 \leq H_\phi(\eta_1)$ . As a result, we have

$$\psi(\bar{\eta}_1\bar{\eta}_2 - \eta_1\eta_2) \leq H_\phi^-(\eta_2)\left(H_\phi^-(\eta_1) - H_\phi(\eta_1)\right) + H_\phi(\eta_1)\left(H_\phi^-(\eta_2) - H_\phi(\eta_2)\right)$$

which proves Eq. (1).

Finally, we have

$$\begin{aligned} \psi(R(h_2) - R^*) &\leq \mathbb{E}_{\mathbf{z}} \left[ c_1 \mathbb{1}(\text{sign}(h) \neq \alpha^*) \left( H_\phi^-(\eta_1)H_\phi^-(\eta_2) - H_\phi(\eta_1)H_\phi(\eta_2) \right) \right] \\ &\leq \mathbb{E}_{\mathbf{z}} \left[ c_1 \mathbb{1}(\text{sign}(h) \neq \alpha^*) \left( C^{\eta_1}(h_1(x_1))C^{\eta_2}(h_2(x_2)) - H_\phi(\eta_1)H_\phi(\eta_2) \right) \right] \\ &\leq \mathbb{E}_{\mathbf{z}} \left[ c_1 \left( C^{\eta_1}(h_1(x_1))C^{\eta_2}(h_2(x_2)) - H_\phi(\eta_1)H_\phi(\eta_2) \right) \right] \\ &= R_\phi(h_2) - R_\phi^*. \end{aligned}$$

□

## 1.2 Extending to General Situations

We prove that Theorem 1 can be extended to  $h_3$ , then, it can be similarly extended to any  $k$ . Note that the key is to prove

$$\begin{aligned} \psi(C^{\eta_1}(h_1(x_1))C^{\eta_2}(h_2(x_2))C^{\eta_3}(h_3(x_3)) - H(\eta_1)H(\eta_2)H(\eta_3)) \\ \leq H_\phi^-(\eta_1)H_\phi^-(\eta_2)H_\phi^-(\eta_3) - H_\phi(\eta_1)H_\phi(\eta_2)H_\phi(\eta_3). \end{aligned} \tag{3}$$

Similarly, we consider three cases: (1) only one classifier from  $h_1, h_2, h_3$  makes the prediction that is opposite to  $\alpha^*$ ; (2) two classifiers from  $h_1, h_2, h_3$  make predictions that are opposite to  $\alpha^*$ ; and (3) all three classifiers make predictions that are opposite to  $\alpha^*$ .

For Case (1), the proof is similar to that in Section 1.1.

For Case (2), assume that  $h_1, h_2$  make the opposite predictions. Then, we have

$$\begin{aligned} & \psi(C^{\eta_1}(h_1(x_1))C^{\eta_2}(h_2(x_2))C^{\eta_3}(h_3(x_3)) - H(\eta_1)H(\eta_2)H(\eta_3)) \\ &= \psi((\bar{\eta}_1\bar{\eta}_2 - \eta_1\eta_2)\eta_3) \leq \eta_3\psi(\bar{\eta}_1\bar{\eta}_2 - \eta_1\eta_2). \end{aligned}$$

Thus, based on Eq. (1), we can prove Eq. (3).

For Case (3), without loss of generality, assume that  $\eta_1 \leq \eta_2 \leq \eta_3$ , i.e.,  $\bar{\eta}_3 \leq \bar{\eta}_2 \leq \bar{\eta}_1$ . Then, we have

$$\begin{aligned} & \psi(C^{\eta_1}(h_1(x_1))C^{\eta_2}(h_2(x_2))C^{\eta_3}(h_3(x_3)) - H(\eta_1)H(\eta_2)H(\eta_3)) \\ &= \psi(\bar{\eta}_1\bar{\eta}_2\bar{\eta}_3 - \eta_1\eta_2\eta_3) \\ &= \psi(\bar{\eta}_3(\bar{\eta}_1\bar{\eta}_2 - \eta_1\eta_2) + \eta_1\eta_2(\bar{\eta}_3 - \eta_3)). \end{aligned}$$

Based on Eq. (2), it follows that

$$\begin{aligned} & \psi(\bar{\eta}_3(\bar{\eta}_1\bar{\eta}_2 - \eta_1\eta_2) + \eta_1\eta_2(\bar{\eta}_3 - \eta_3)) \\ &= \psi(\bar{\eta}_3\bar{\eta}_2(\bar{\eta}_1 - \eta_1) + \bar{\eta}_3\eta_1(\bar{\eta}_2 - \eta_2) + \eta_1\eta_2(\bar{\eta}_3 - \eta_3)) \\ &\leq \psi(\bar{\eta}_1\bar{\eta}_2(\bar{\eta}_1 - \eta_1) + \bar{\eta}_2\eta_1(\bar{\eta}_2 - \eta_2) + \eta_1\eta_2(\bar{\eta}_3 - \eta_3)) \\ &\leq \bar{\eta}_1\bar{\eta}_2\psi(\bar{\eta}_1 - \eta_1) + \bar{\eta}_2\eta_1\psi(\bar{\eta}_2 - \eta_2) + \eta_1\eta_2\psi(\bar{\eta}_3 - \eta_3). \end{aligned}$$

Then, since  $\bar{\eta}_1 \leq 1 \leq H_\phi^-(\eta_2)$ ,  $\bar{\eta}_2 \leq 1 \leq H_\phi^-(\eta_3)$ ,  $\eta_1 \leq H_\phi(\eta_1)$ ,  $\eta_2 \leq H_\phi(\eta_2)$ , it follows that

$$\begin{aligned} & \bar{\eta}_1\bar{\eta}_2\psi(\bar{\eta}_1 - \eta_1) + \bar{\eta}_2\eta_1\psi(\bar{\eta}_2 - \eta_2) + \eta_1\eta_2\psi(\bar{\eta}_3 - \eta_3) \\ &\leq H_\phi^-(\eta_2)H_\phi^-(\eta_3)\left(H_\phi^-(\eta_1) - H_\phi(\eta_1)\right) + H_\phi^-(\eta_3)H_\phi(\eta_1)\left(H_\phi^-(\eta_2) - H_\phi(\eta_2)\right) \\ &\quad + H_\phi(\eta_1)H_\phi(\eta_2)\left(H_\phi^-(\eta_3) - H_\phi(\eta_3)\right) \\ &= H_\phi^-(\eta_1)H_\phi^-(\eta_2)H_\phi^-(\eta_3) - H_\phi(\eta_1)H_\phi(\eta_2)H_\phi(\eta_3), \end{aligned}$$

which proves the Eq. (3).

## References

- [1] Peter L Bartlett, Michael I Jordan, and Jon D McAuliffe. Convexity, classification, and risk bounds. *Journal of the American Statistical Association*, 101(473):138–156, 2006.
